# Supplementary material
Source: MDPI journal article supplement (https://www.mdpi.com/2073-4344/13/4/695)
Supplement: s1 [file s1]

# Non-Thermal Plasma Incorporated with Cu-Mn/ $\gamma$ -Al<sub>2</sub>O<sub>3</sub> for Mixed Benzene Series VOCs' Degradation

## Supplementary Materials

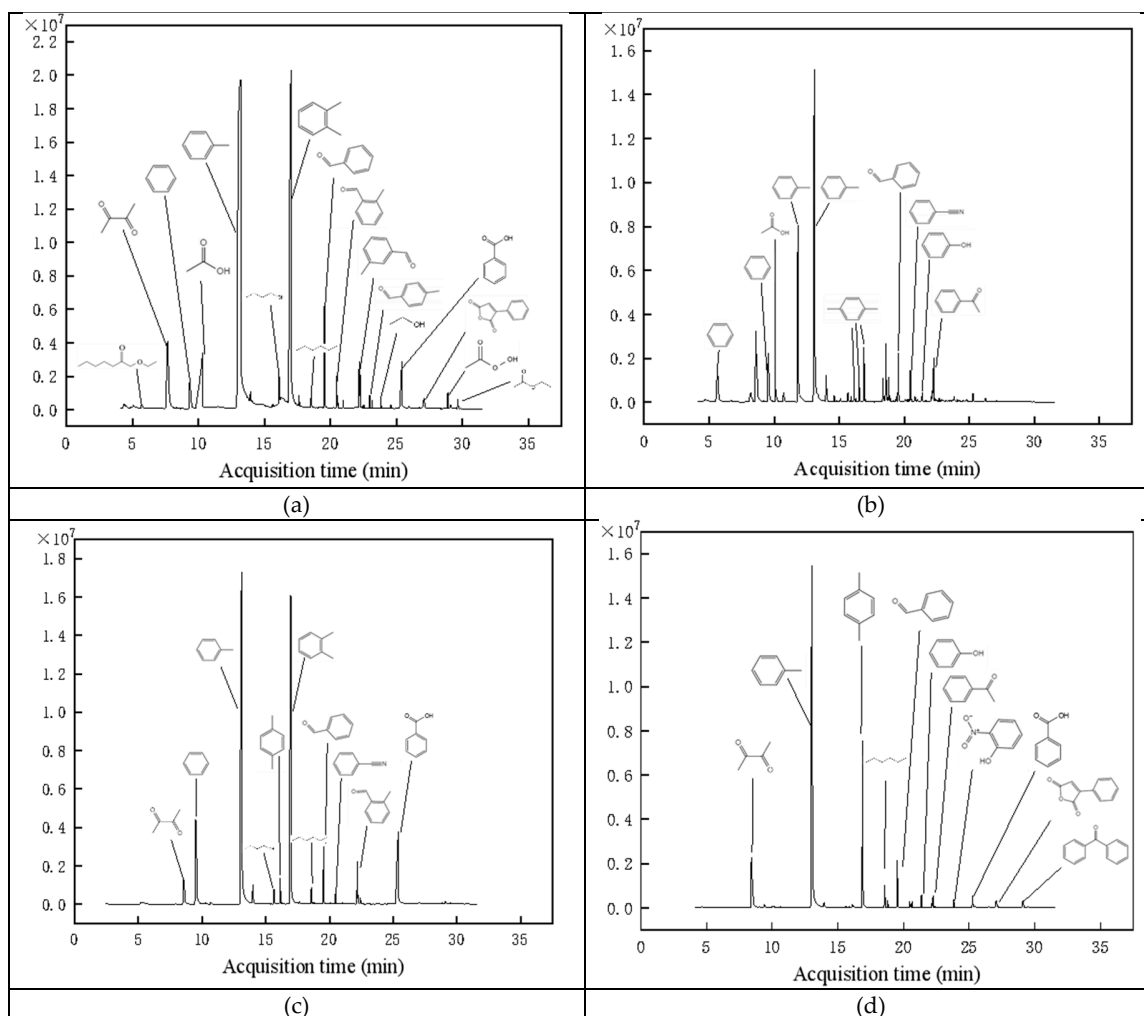



**TableS1.** Types of main by-products.

| Serial number | Test substance                                                                       | Name                    |
|---------------|--------------------------------------------------------------------------------------|-------------------------|
| 1             |     | Benzene                 |
| 2             |     | Acetic acid             |
| 3             |     | Toluene                 |
| 4             |    | P-xylene                |
| 5             |     | Benzaldehyde            |
| 6             |     | Benzonitrile            |
| 7             |     | Phenol                  |
| 8             |     | Acetophenone            |
| 9             |     | Butanedione             |
| 10            |     | O-xylene                |
| 11            |     | N-butyl alcohol         |
| 12            |   | Hexane                  |
| 13            |   | O-Tolualdehyde          |
| 14            |   | Benzoic acid            |
| 15            |   | 2-nitrophenol           |
| 16            |  | Phenyl maleic anhydride |
| 17            |   | Diphenyl ketone         |
| 18            |   | Acetonitrile            |
| 19            |   | O-methyl benzonitrile   |
| 20            |   | Isooctyl alcohol        |
| 21            |   | 2-ethyl toluene         |
| 22            |   | Ethanol                 |
| 23            |  | 2-methoxyethanol        |

Table S2. Comparison of degradation efficiency for this and other studies

| Reactor type            | Catalyst                                         | VOC                                                    | Specific input energy | Voltage(kV) | Degradation efficiency | References |
|-------------------------|--------------------------------------------------|--------------------------------------------------------|-----------------------|-------------|------------------------|------------|
| DBD                     | Mn <sub>1</sub> Co <sub>1</sub>                  | toluene 27.3ppm                                        | /                     | 12          | 100%                   | [65]       |
| DBD                     | ZrMnFe/SEP                                       | toluene                                                | 40J/L                 |             | 87%                    | [66]       |
| Corona discharge plasma | honeycomb catalyst                               | toluene 15ppm                                          | 58J/L                 | /           | 80%                    | [67]       |
| DBD                     | Mn/Al <sub>2</sub> O <sub>3</sub> -MA            | o-xylene 9ppm                                          | 18J/L                 | /           | 100%                   | [24]       |
| DBD                     | MnO <sub>x</sub> /Al <sub>2</sub> O <sub>3</sub> | benzene, toluene and p-xylene (BTX mixture) 1.0–1.5ppm | 10J/L                 | /           | 94%<br>97%<br>95%      | [10]       |
| DBD                     | Cu-Mn/ $\gamma$ -Al <sub>2</sub> O <sub>3</sub>  | toluene and o-xylene mixture 700ppm                    | 5.72kJ/L              | /           | 100%<br>100%           |            |
